# Supplementary material for: The interrelationship of chronic cough and depression: a prospective population-based study
Source: PubMed Central journal article supplement — ERJ Open Res. 2022 Apr 4;8(2):00069-2022. doi: 10.1183/23120541.00069-2022 (PMC8982749; doi:10.1183/23120541.00069-2022), 2022-04-04
Supplement: 00069-2022.SUPPLEMENT.pdf [file 00069-2022.SUPPLEMENT.pdf]

**Supplemental Table 1: The cross-sectional association between chronic cough and depressive symptoms at baseline (stratified)**

| <b>Participants with respiratory disease<br/>(n=950)</b>                                                                                                                                                                                                                                                                                                                                                                                                                               | <b>CES-D scores<br/>median (IQR)</b> | <b>Model 1<br/>standardized mean adjusted<br/>difference (95% CI) in depressive<br/>symptoms at baseline</b> | <b>Model 2<br/>standardized mean adjusted<br/>difference (95% CI) in depressive<br/>symptoms at baseline</b>  |
|----------------------------------------------------------------------------------------------------------------------------------------------------------------------------------------------------------------------------------------------------------------------------------------------------------------------------------------------------------------------------------------------------------------------------------------------------------------------------------------|--------------------------------------|--------------------------------------------------------------------------------------------------------------|---------------------------------------------------------------------------------------------------------------|
| No chronic cough (n=680)                                                                                                                                                                                                                                                                                                                                                                                                                                                               | 5 (2 – 12)                           | Ref.                                                                                                         | Ref.                                                                                                          |
| Chronic cough (n=270)                                                                                                                                                                                                                                                                                                                                                                                                                                                                  | 7 (3 – 13)                           | 0.12 (-0.02 – 0.25)                                                                                          | 0.06 (-0.08 – 0.19)                                                                                           |
| <b>Participants without respiratory disease<br/>(n = 4,902)</b>                                                                                                                                                                                                                                                                                                                                                                                                                        | <b>CES-D scores<br/>median (IQR)</b> | <b>Model 1<br/>standardized mean adjusted<br/>difference (95% CI) in depressive<br/>symptoms at baseline</b> | <b>Model 2b<br/>standardized mean adjusted<br/>difference (95% CI) in depressive<br/>symptoms at baseline</b> |
| No chronic cough (n=4,448)                                                                                                                                                                                                                                                                                                                                                                                                                                                             | 4 (1 – 9)                            | Ref.                                                                                                         | Ref.                                                                                                          |
| Chronic cough (n=454)                                                                                                                                                                                                                                                                                                                                                                                                                                                                  | 5 (2 – 11)                           | 0.24 (0.14 – 0.33)                                                                                           | 0.19 (0.10 – 0.28)                                                                                            |
| <p>CES-D scores were square root-transformed and z-standardized; Respiratory disease= chronic rhinosinusitis, obstructive airway disease, or lung cancer; Model 1 – adjusted for age and sex; Model 2 – adjusted for age, sex, BMI, smoking, chronic rhinosinusitis, GERD, obstructive airway disease, lung cancer, diabetes, and heart failure; Model 2b – adjusted for age, sex, BMI, smoking, GERD, diabetes, and heart failure. 25 participants did not have CES-D score data.</p> |                                      |                                                                                                              |                                                                                                               |

**Supplemental Table 2: The cross-sectional association between chronic cough and clinically relevant depressive symptoms at baseline (stratified)**

| <b>Participants with respiratory disease<br/>(n=950)</b>                                                                                                                                                                                                                                                                 | <b>CES-D score <math>\geq</math> 16<br/>(n=165, 17.4%)</b> | <b>Model 1<br/>OR (95% CI)</b> | <b>Model 2<br/>OR (95% CI)</b>  |
|--------------------------------------------------------------------------------------------------------------------------------------------------------------------------------------------------------------------------------------------------------------------------------------------------------------------------|------------------------------------------------------------|--------------------------------|---------------------------------|
| No chronic cough (n=680)                                                                                                                                                                                                                                                                                                 | 121 (17.8%)                                                | Ref.                           | Ref.                            |
| Chronic cough (n=270)                                                                                                                                                                                                                                                                                                    | 44 (16.3%)                                                 | 0.89 (0.60 – 1.31)             | 0.78 (0.52 – 1.17)              |
| <b>Participants without respiratory disease<br/>(n = 4,902)</b>                                                                                                                                                                                                                                                          | <b>CES-D score <math>\geq</math> 16<br/>(n=590, 12.0%)</b> | <b>Model 1<br/>OR (95% CI)</b> | <b>Model 2b<br/>OR (95% CI)</b> |
| No chronic cough (n=4,448)                                                                                                                                                                                                                                                                                               | 515 (11.6%)                                                | Ref.                           | Ref.                            |
| Chronic cough (n=454)                                                                                                                                                                                                                                                                                                    | 75 (16.5%)                                                 | 1.49 (1.14 – 1.96)             | 1.35 (1.02 – 1.77)              |
| Model 1 – adjusted for age and sex; Model 2 – adjusted for age, sex, BMI, smoking, chronic rhinosinusitis, GERD, obstructive airway disease, lung cancer, diabetes, and heart failure; Model 2b – adjusted for age, sex, BMI, smoking, GERD, diabetes, and heart failure. 25 participants did not have CES-D score data. |                                                            |                                |                                 |
